# Supplementary material
Source: PubMed Central journal article supplement (PMC1143696)
Supplement: nar_33_10_3224__1.pdf [file nar_33_10_3224__1.pdf]

**Supplementary Table 1: Chromosomes analyzed in Figure 3.** For each chromosome we show the overall strand bias of the genome, the median separation between adjacent pairs of genes on both strands, and the proportion of conserved pairs on both strands.  $p$  is from the Kolmogorov-Smirnov test and is not corrected for multiple testing.

| Chromosome                                                 | %Leading | Median Distance |         | <i>p</i> | % Conserved |         |
|------------------------------------------------------------|----------|-----------------|---------|----------|-------------|---------|
|                                                            |          | Leading         | Lagging |          | Leading     | Lagging |
| <i>Acinetobacter sp. ADP1</i>                              | 61%      | 42              | 73      | 2e-06    | 35.7%       | 30.9%   |
| <i>Agrobacterium tumefaciens str. C58 (Cereon)</i>         | 56%      | 43              | 48      | 0.40     | 33.1%       | 27.7%   |
| <i>Bacillus anthracis str. 'Ames Ancestor'</i>             | 75%      | 72              | 102     | 0.001    | 25.8%       | 11.5%   |
| <i>Bacillus anthracis str. Ames</i>                        | 75%      | 71              | 101     | 6e-04    | 25.0%       | 11.2%   |
| <i>Bacillus anthracis str. Sterne</i>                      | 76%      | 70              | 80      | 0.43     | 26.2%       | 12.0%   |
| <i>Bacillus cereus ATCC 10987</i>                          | 74%      | 66              | 82      | 0.04     | 26.8%       | 11.4%   |
| <i>Bacillus cereus ATCC 14579</i>                          | 76%      | 82              | 101     | 0.01     | 25.8%       | 11.1%   |
| <i>Bacillus cereus ZK</i>                                  | 75%      | 74              | 83      | 0.29     | 28.3%       | 13.7%   |
| <i>Bacillus halodurans</i>                                 | 78%      | 62              | 58      | 0.03     | 31.7%       | 24.0%   |
| <i>Bacillus licheniformis ATCC 14580</i>                   | 75%      | 53              | 61      | 0.32     | 32.5%       | 20.6%   |
| <i>Bacillus licheniformis DSM 13</i>                       | 75%      | 50              | 58      | 0.17     | 33.8%       | 19.6%   |
| <i>Bacillus subtilis</i>                                   | 75%      | 56              | 61      | 0.85     | 32.2%       | 17.6%   |
| <i>Bacillus thuringiensis serovar konkukian str. 97-27</i> | 75%      | 77              | 82      | 0.38     | 28.2%       | 12.0%   |
| <i>Bacteroides fragilis</i>                                | 57%      | 35              | 32      | 0.30     | 16.6%       | 15.9%   |
| <i>Bacteroides thetaiotaomicron VPI-5482</i>               | 59%      | 42              | 49      | 0.16     | 15.9%       | 15.5%   |
| <i>Bartonella henselae str. Houston-1</i>                  | 57%      | 68              | 67      | 0.58     | 39.0%       | 29.5%   |
| <i>Bartonella quintana</i>                                 | 55%      | 81              | 77      | 0.21     | 46.3%       | 32.0%   |
| <i>Bdellovibrio bacteriovorus HD100</i>                    | 56%      | 19              | 26      | 0.34     | 24.0%       | 12.9%   |
| <i>Bordetella bronchiseptica RB50</i>                      | 56%      | 27              | 26      | 0.24     | 37.6%       | 35.2%   |
| <i>Bordetella parapertussis 12822</i>                      | 57%      | 29              | 28      | 0.18     | 38.8%       | 35.3%   |
| <i>Brucella melitensis chromosome I</i>                    | 60%      | 66              | 67      | 0.41     | 37.4%       | 26.8%   |
| <i>Brucella melitensis chromosome II</i>                   | 56%      | 34              | 50      | 0.09     | 26.4%       | 31.7%   |
| <i>Brucella suis 1330 chromosome I</i>                     | 59%      | 62              | 64      | 0.72     | 37.9%       | 27.3%   |
| <i>Brucella suis 1330 chromosome II</i>                    | 56%      | 26              | 40      | 0.19     | 30.7%       | 34.2%   |
| <i>Buchnera aphidicola (Baizongia pistaciae)</i>           | 57%      | 74              | 83      | 0.89     | 64.3%       | 61.3%   |
| <i>Burkholderia mallei ATCC 23344 chromosome 1</i>         | 57%      | 73              | 74      | 0.99     | 49.8%       | 38.8%   |
| <i>Burkholderia mallei ATCC 23344 chromosome 2</i>         | 56%      | 74              | 86      | 0.12     | 30.4%       | 22.7%   |
| <i>Burkholderia pseudomallei K96243 chromosome 1</i>       | 58%      | 63              | 66      | 0.02     | 50.7%       | 40.6%   |
| <i>Burkholderia pseudomallei K96243 chromosome 2</i>       | 59%      | 53              | 79      | 0.002    | 32.2%       | 27.2%   |
| <i>Campylobacter jejuni</i>                                | 61%      | 4               | 2       | 0.43     | 44.7%       | 45.3%   |
| <i>Candidatus Blochmannia floridanus</i>                   | 66%      | 84              | 77      | 0.13     | 66.0%       | 63.0%   |
| <i>Caulobacter crescentus CB15</i>                         | 55%      | 49              | 51      | 0.99     | 35.1%       | 27.5%   |
| <i>Chlamydia muridarum</i>                                 | 55%      | 28              | 26      | 0.12     | 25.1%       | 17.9%   |
| <i>Chlamydia trachomatis</i>                               | 56%      | 31              | 28      | 0.26     | 26.0%       | 17.7%   |
| <i>Chlamydophila pneumoniae AR39</i>                       | 54%      | 34              | 35      | 0.16     | 21.8%       | 14.1%   |
| <i>Chlamydophila pneumoniae CWL029</i>                     | 55%      | 37              | 34      | 0.38     | 22.9%       | 14.9%   |
| <i>Chlamydophila pneumoniae J138</i>                       | 55%      | 35              | 33      | 0.46     | 22.5%       | 14.9%   |
| <i>Chlamydophila pneumoniae TW-183</i>                     | 55%      | 37              | 33      | 0.05     | 21.2%       | 14.3%   |
| <i>Chlorobium tepidum TLS</i>                              | 57%      | 41              | 38      | 0.25     | 24.9%       | 23.0%   |
| <i>Chromobacterium violaceum ATCC 12472</i>                | 57%      | 52              | 52      | 0.65     | 39.0%       | 33.2%   |
| <i>Clostridium acetobutylicum ATCC824</i>                  | 79%      | 57              | 61      | 0.40     | 30.6%       | 21.8%   |
| <i>Clostridium perfringens</i>                             | 83%      | 94              | 94      | 0.47     | 35.0%       | 27.6%   |
| <i>Clostridium tetani E88</i>                              | 82%      | 58              | 30      | 0.01     | 37.4%       | 27.3%   |
| <i>Corynebacterium diphtheriae</i>                         | 63%      | 42              | 38      | 0.34     | 36.2%       | 23.8%   |
| <i>Corynebacterium glutamicum ATCC 13032</i>               | 59%      | 53              | 57      | 0.49     | 32.7%       | 19.9%   |

| Chromosome                                                                            | %Leading | Median Distance |         | <i>p</i> | % Conserved |         |
|---------------------------------------------------------------------------------------|----------|-----------------|---------|----------|-------------|---------|
|                                                                                       |          | Leading         | Lagging |          | Leading     | Lagging |
| <i>Coxiella burnetii</i> RSA 493                                                      | 59%      | 29              | 29      | 0.73     | 33.9%       | 27.6%   |
| <i>Desulfotalea psychrophila</i> L5v54                                                | 54%      | 63              | 52      | 0.01     | 27.7%       | 31.3%   |
| <i>Enterococcus faecalis</i> V583                                                     | 81%      | 33              | 42      | 0.88     | 38.1%       | 30.6%   |
| <i>Erwinia carotovora</i> subsp. <i>atroseptica</i> SCRI1043                          | 57%      | 54              | 58      | 0.41     | 41.8%       | 37.1%   |
| <i>Escherichia coli</i> CFT073                                                        | 55%      | 28              | 30      | 0.97     | 33.1%       | 31.2%   |
| <i>Escherichia coli</i> K12                                                           | 56%      | 37              | 40      | 0.57     | 40.7%       | 34.3%   |
| <i>Escherichia coli</i> O157:H7                                                       | 59%      | 32              | 38      | 0.15     | 30.0%       | 29.8%   |
| <i>Escherichia coli</i> O157:H7 EDL933                                                | 58%      | 36              | 41      | 0.62     | 29.9%       | 29.7%   |
| <i>Fusobacterium nucleatum</i> subsp. <i>nucleatum</i> ATCC 25586                     | 65%      | 26              | 24      | 0.16     | 25.6%       | 26.0%   |
| <i>Haemophilus ducreyi</i> 35000HP                                                    | 58%      | 43              | 48      | 0.39     | 43.1%       | 38.1%   |
| <i>Haemophilus influenzae</i> Rd                                                      | 56%      | 50              | 30      | 0.007    | 56.5%       | 61.8%   |
| <i>Helicobacter hepaticus</i> ATCC 51449                                              | 57%      | 17              | 15      | 0.32     | 44.2%       | 43.3%   |
| <i>Helicobacter pylori</i> J99 <i>Helicobacter pylori</i> , strain J99                | 57%      | 14              | 13      | 0.23     | 46.0%       | 41.7%   |
| <i>Lactobacillus johnsonii</i> NCC 533                                                | 79%      | 27              | 38      | 0.30     | 41.7%       | 22.5%   |
| <i>Lactobacillus plantarum</i> WCFS1                                                  | 74%      | 56              | 54      | 0.75     | 38.6%       | 23.5%   |
| <i>Lactococcus lactis</i> subsp. <i>lactis</i>                                        | 81%      | 85              | 71      | 0.23     | 31.9%       | 30.0%   |
| <i>Legionella pneumophila</i> str. <i>Lens</i>                                        | 57%      | 38              | 63      | 0.03     | 39.4%       | 25.8%   |
| <i>Legionella pneumophila</i> str. <i>Paris</i>                                       | 58%      | 41              | 59      | 0.32     | 37.7%       | 26.1%   |
| <i>Legionella pneumophila</i> str. <i>Philadelphia 1</i>                              | 57%      | 35              | 63      | 0.03     | 39.3%       | 26.3%   |
| <i>L. interrogans</i> sv. <i>Copenhageni</i> str. <i>Fiocruz L1-130</i> chr. <i>I</i> | 57%      | 33              | 59      | 0.001    | 17.7%       | 10.1%   |
| <i>L. interrogans</i> sv. <i>lai</i> str. <i>56601</i> chr. <i>I</i>                  | 57%      | 42              | 48      | 0.32     | 14.2%       | 7.7%    |
| <i>Listeria innocua</i> Clip11262                                                     | 81%      | 30              | 34      | 0.56     | 36.9%       | 31.1%   |
| <i>Listeria monocytogenes</i> EGD-e                                                   | 79%      | 37              | 28      | 0.35     | 38.3%       | 33.3%   |
| <i>Listeria monocytogenes</i> str. <i>4b F2365</i>                                    | 79%      | 42              | 31      | 0.23     | 38.0%       | 31.5%   |
| <i>Mannheimia succiniciproducens</i> MBEL55E                                          | 57%      | 36              | 30      | 0.22     | 51.1%       | 46.0%   |
| <i>Mesoplasma florum</i> L1                                                           | 89%      | 23              | 59      | 0.46     | 48.6%       | 34.8%   |
| <i>Methylococcus capsulatus</i> str. <i>Bath</i>                                      | 56%      | 26              | 23      | 0.03     | 42.3%       | 41.8%   |
| <i>Mycobacterium bovis</i> subsp. <i>bovis</i> AF2122/97                              | 60%      | 25              | 34      | 0.02     | 27.4%       | 16.2%   |
| <i>Mycobacterium leprae</i> strain TN                                                 | 65%      | 79              | 90      | 0.71     | 41.7%       | 18.5%   |
| <i>Mycobacterium tuberculosis</i> CDC1551                                             | 59%      | 25              | 31      | 0.13     | 24.6%       | 15.2%   |
| <i>Mycobacterium tuberculosis</i> H37Rv                                               | 59%      | 24              | 36      | 0.002    | 26.1%       | 15.7%   |
| <i>Mycoplasma gallisepticum</i> R                                                     | 79%      | 13              | 19      | 0.25     | 35.2%       | 25.3%   |
| <i>Mycoplasma genitalium</i>                                                          | 80%      | 5               | 3       | 0.31     | 39.6%       | 33.3%   |
| <i>Mycoplasma penetrans</i>                                                           | 82%      | 76              | 66      | 0.40     | 27.2%       | 25.0%   |
| <i>Neisseria meningitidis</i> MC58                                                    | 55%      | 66              | 65      | 0.35     | 25.9%       | 23.1%   |
| <i>Neisseria meningitidis</i> Z2491                                                   | 56%      | 62              | 65      | 0.02     | 27.2%       | 24.5%   |
| <i>Nitrosomonas europaea</i> ATCC 19718                                               | 57%      | 48              | 53      | 0.75     | 46.1%       | 40.6%   |
| <i>Oceanobacillus iheyensis</i> HTE831                                                | 76%      | 64              | 53      | 0.003    | 35.4%       | 25.2%   |
| <i>Pasteurella multocida</i>                                                          | 58%      | 40              | 38      | 0.54     | 60.2%       | 61.7%   |
| <i>Photobacterium profundum</i> SS9 chromosome 1                                      | 58%      | 81              | 98      | 0.04     | 42.8%       | 30.9%   |
| <i>Photobacterium profundum</i> SS9 chromosome 2                                      | 54%      | 112             | 100     | 0.03     | 17.2%       | 20.7%   |
| <i>Photorhabdus luminescens</i> subsp. <i>laumondii</i> TTO1                          | 58%      | 53              | 48      | 0.17     | 30.8%       | 28.7%   |
| <i>Propionibacterium acnes</i> KPA171202                                              | 61%      | 33              | 44      | 0.32     | 40.7%       | 29.7%   |
| <i>Pseudomonas aeruginosa</i> PA01                                                    | 56%      | 48              | 56      | 0.25     | 41.1%       | 34.1%   |
| <i>Pseudomonas putida</i> KT2440                                                      | 55%      | 41              | 52      | 0.03     | 37.6%       | 31.9%   |

| Chromosome                                                          | %Leading | Median Distance |         | <i>p</i> | % Conserved |         |
|---------------------------------------------------------------------|----------|-----------------|---------|----------|-------------|---------|
|                                                                     |          | Leading         | Lagging |          | Leading     | Lagging |
| <i>Pseudomonas syringae</i> pv. <i>tomato</i> str. DC3000           | 53%      | 50              | 57      | 0.004    | 39.3%       | 32.2%   |
| <i>Ralstonia solanacearum</i>                                       | 60%      | 44              | 48      | 0.86     | 45.5%       | 37.8%   |
| <i>Rhodopseudomonas palustris</i>                                   | 57%      | 62              | 75      | 0.14     | 32.7%       | 26.2%   |
| <i>Rickettsia conorii</i> Malish 7                                  | 61%      | 102             | 74      | 0.06     | 18.2%       | 12.4%   |
| <i>Rickettsia prowazekii</i> strain Madrid E                        | 62%      | 94              | 88      | 0.75     | 28.2%       | 23.0%   |
| <i>Salmonella enterica</i> subsp. <i>enterica</i> serovar Typhi     | 58%      | 44              | 44      | 0.99     | 36.8%       | 32.7%   |
| <i>Salmonella enterica</i> subsp. <i>enterica</i> serovar Typhi Ty2 | 58%      | 47              | 45      | 0.98     | 37.8%       | 32.9%   |
| <i>Salmonella typhimurium</i> LT2                                   | 59%      | 42              | 46      | 0.27     | 40.3%       | 35.8%   |
| <i>Shewanella oneidensis</i> MR-1                                   | 56%      | 71              | 74      | 0.86     | 34.5%       | 27.6%   |
| <i>Shigella flexneri</i> 2a str. 2457T                              | 55%      | 42              | 44      | 0.14     | 34.0%       | 25.9%   |
| <i>Shigella flexneri</i> 2a str. 301                                | 55%      | 34              | 36      | 0.21     | 33.7%       | 25.8%   |
| <i>Sinorhizobium meliloti</i> 1021                                  | 56%      | 73              | 71      | 0.66     | 34.0%       | 27.6%   |
| <i>Staphylococcus aureus</i> subsp. <i>aureus</i> MRSA252           | 75%      | 39              | 66      | 0.22     | 35.7%       | 22.3%   |
| <i>Staphylococcus aureus</i> subsp. <i>aureus</i> MSSA476           | 76%      | 47              | 64      | 0.65     | 37.1%       | 25.6%   |
| <i>Staphylococcus aureus</i> subsp. <i>aureus</i> Mu50              | 75%      | 42              | 67      | 0.10     | 36.6%       | 23.7%   |
| <i>Staphylococcus aureus</i> subsp. <i>aureus</i> MW2               | 76%      | 48              | 67      | 0.47     | 37.9%       | 25.3%   |
| <i>Staphylococcus aureus</i> subsp. <i>aureus</i> N315              | 75%      | 48              | 76      | 0.14     | 38.3%       | 23.4%   |
| <i>Staphylococcus epidermidis</i> ATCC 12228                        | 73%      | 52              | 56      | 0.99     | 38.3%       | 24.9%   |
| <i>Streptococcus agalactiae</i> 2603V/R                             | 81%      | 38              | 43      | 0.34     | 42.4%       | 45.4%   |
| <i>Streptococcus agalactiae</i> NEM316                              | 82%      | 41              | 51      | 0.63     | 42.6%       | 48.3%   |
| <i>Streptococcus mutans</i> UA159                                   | 81%      | 50              | 45      | 0.81     | 46.4%       | 37.9%   |
| <i>Streptococcus pneumoniae</i> R6                                  | 79%      | 33              | 22      | 0.48     | 42.4%       | 39.1%   |
| <i>Streptococcus pneumoniae</i> TIGR4                               | 80%      | 35              | 51      | 0.54     | 40.5%       | 40.3%   |
| <i>Streptococcus pyogenes</i> M1 GAS                                | 80%      | 43              | 51      | 0.62     | 46.7%       | 45.9%   |
| <i>Streptococcus pyogenes</i> MGAS10394                             | 79%      | 32              | 48      | 0.18     | 45.7%       | 41.3%   |
| <i>Streptococcus pyogenes</i> MGAS315                               | 82%      | 39              | 50      | 0.68     | 43.9%       | 45.0%   |
| <i>Streptococcus pyogenes</i> MGAS8232                              | 81%      | 30              | 56      | 0.04     | 44.6%       | 45.9%   |
| <i>Streptococcus pyogenes</i> SSI-1                                 | 81%      | 38              | 49      | 0.52     | 43.5%       | 42.6%   |
| <i>Symbiobacterium thermophilum</i>                                 | 74%      | 54              | 46      | 0.53     | 33.3%       | 24.4%   |
| <i>Thermoanaerobacter tengcongensis</i> strain MB4T                 | 86%      | 29              | 19      | 0.07     | 40.3%       | 32.1%   |
| <i>Treponema denticola</i> ATCC 35405                               | 61%      | 25              | 23      | 0.55     | 25.3%       | 23.5%   |
| <i>Treponema pallidum</i>                                           | 66%      | 25              | 22      | 0.32     | 40.6%       | 34.8%   |
| <i>Ureaplasma urealyticum</i>                                       | 72%      | 24              | 19      | 0.24     | 38.6%       | 28.0%   |
| <i>Vibrio cholerae</i> chromosome I                                 | 59%      | 31              | 43      | 0.08     | 44.4%       | 34.4%   |
| <i>Vibrio cholerae</i> chromosome II                                | 59%      | 88              | 56      | 0.002    | 16.2%       | 22.0%   |
| <i>Vibrio parahaemolyticus</i> RIMD 2210633 chromosome I            | 61%      | 49              | 62      | 0.18     | 41.8%       | 34.3%   |
| <i>Vibrio parahaemolyticus</i> RIMD 2210633 chromosome II           | 56%      | 50              | 68      | 0.14     | 22.6%       | 23.6%   |
| <i>Vibrio vulnificus</i> CMCP6 chromosome I                         | 62%      | 57              | 67      | 0.11     | 39.5%       | 34.3%   |
| <i>Vibrio vulnificus</i> CMCP6 chromosome II                        | 54%      | 60              | 85      | 0.08     | 24.7%       | 22.1%   |
| <i>Vibrio vulnificus</i> YJ016 chromosome I                         | 62%      | 41              | 49      | 0.37     | 38.7%       | 32.2%   |
| <i>Vibrio vulnificus</i> YJ016 chromosome II                        | 53%      | 41              | 53      | 0.20     | 23.6%       | 19.1%   |
| <i>Wolinella succinogenes</i>                                       | 60%      | 10              | 9       | 0.43     | 53.7%       | 41.8%   |
| <i>Xanthomonas axonopodis</i> pv. <i>citri</i> str. 306             | 55%      | 67              | 70      | 0.33     | 35.0%       | 28.4%   |
| <i>Xanthomonas campestris</i> pv. <i>campestris</i> str. ATCC 33913 | 56%      | 63              | 69      | 0.33     | 33.5%       | 29.9%   |
| <i>Xylella fastidiosa</i> 9a5c                                      | 59%      | 46              | 52      | 0.88     | 29.9%       | 27.1%   |

| Chromosome                                  | %Leading | Median Distance |         | $p$  | % Conserved |         |
|---------------------------------------------|----------|-----------------|---------|------|-------------|---------|
|                                             |          | Leading         | Lagging |      | Leading     | Lagging |
| <i>Xylella fastidiosa Temecula1</i>         | 57%      | 59              | 60      | 0.71 | 37.3%       | 30.4%   |
| <i>Yersinia pestis KIM</i>                  | 57%      | 65              | 64      | 0.52 | 37.3%       | 33.2%   |
| <i>Yersinia pestis strain CO92</i>          | 57%      | 74              | 70      | 0.47 | 41.2%       | 34.2%   |
| <i>Yersinia pseudotuberculosis IP 32953</i> | 59%      | 66              | 84      | 0.05 | 42.7%       | 37.8%   |
